# Supplementary material for: Synthesis of New 2,5-Di-substituted 1,3,4-Oxadiazoles Bearing 2,6-Di-tert-butylphenol Moieties and Evaluation of Their Antioxidant Activity
Source: PubMed Central journal article supplement (PMC6271237; doi:10.3390/molecules19033436), 2014-03-20

# Supplementary Materials

Figure S1.  $^1\text{H-NMR}$  (400 MHz,  $\text{CDCl}_3$ ) of **5d**.

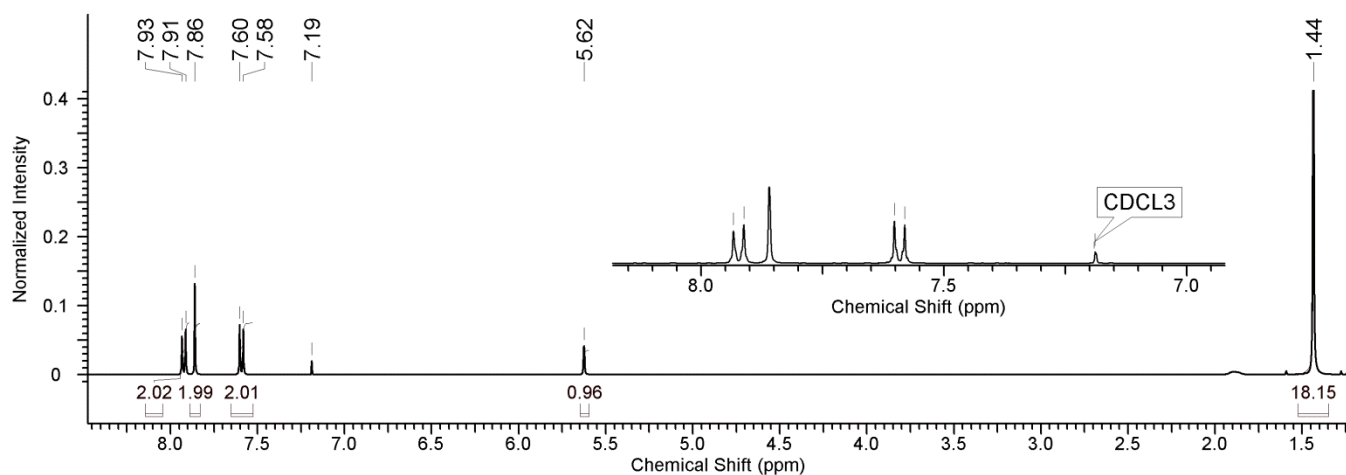

Figure S2.  $^{13}\text{C-NMR}$  (100 MHz,  $\text{CDCl}_3$ ) of **5d**.

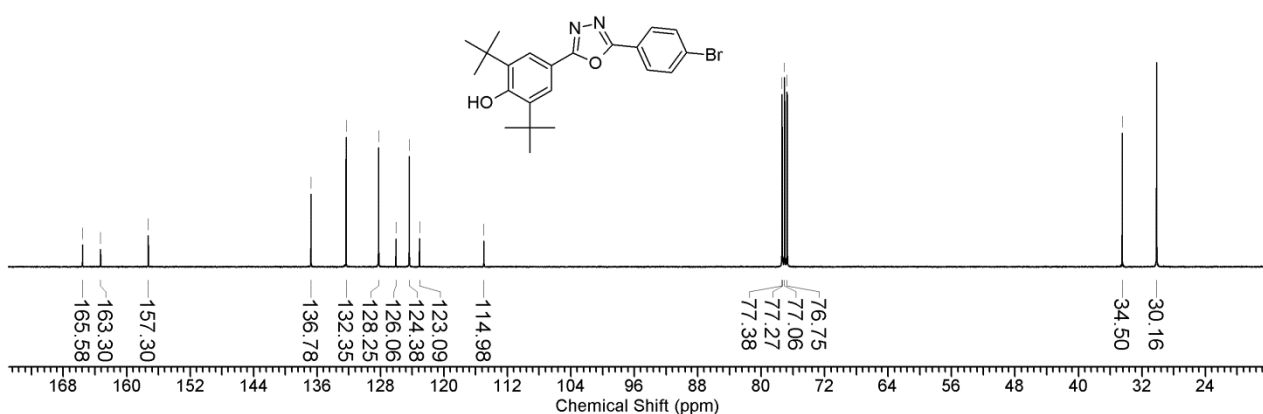

Figure S3. EIMS spectrum of **5a**.

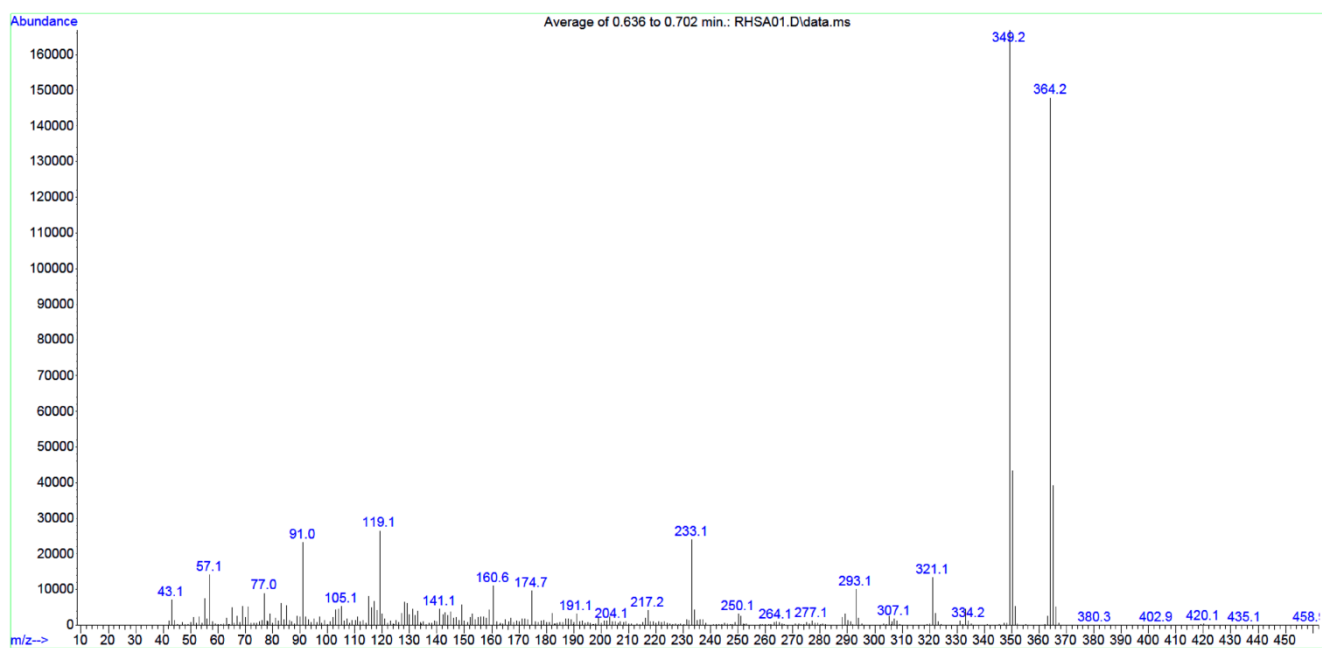

Figure S4. EIMS spectrum of 5b.

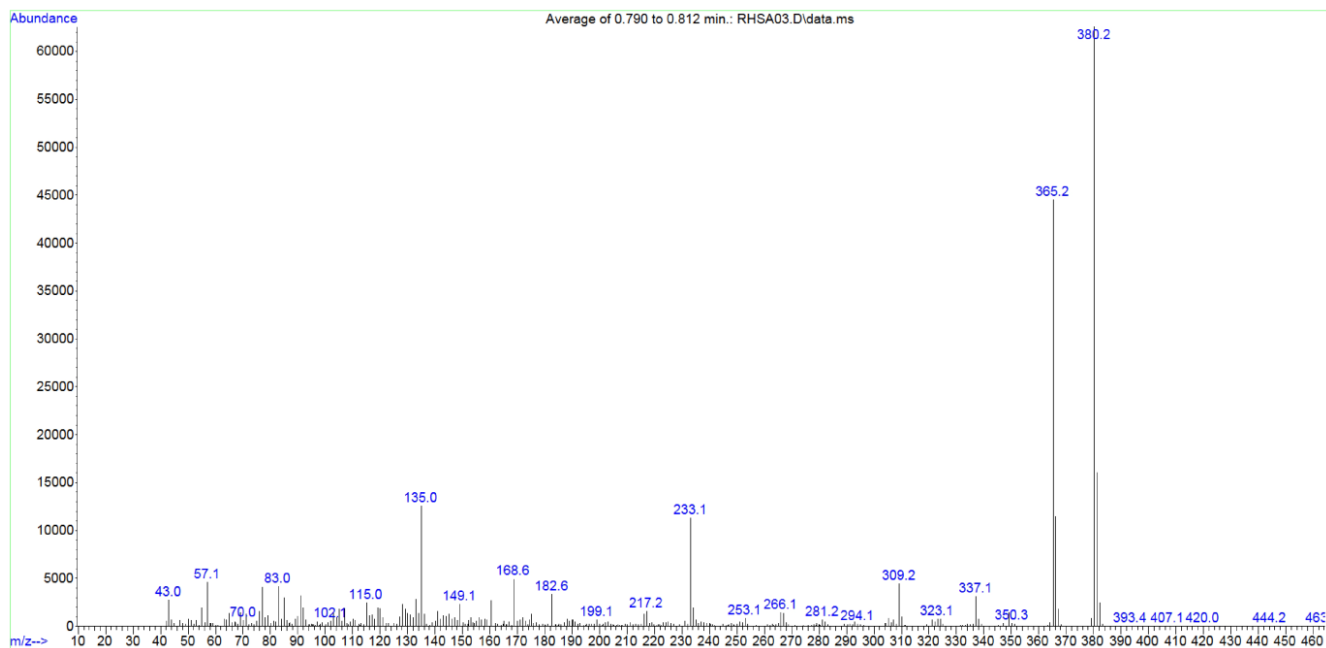

Figure S5. EIMS spectrum of 5c.

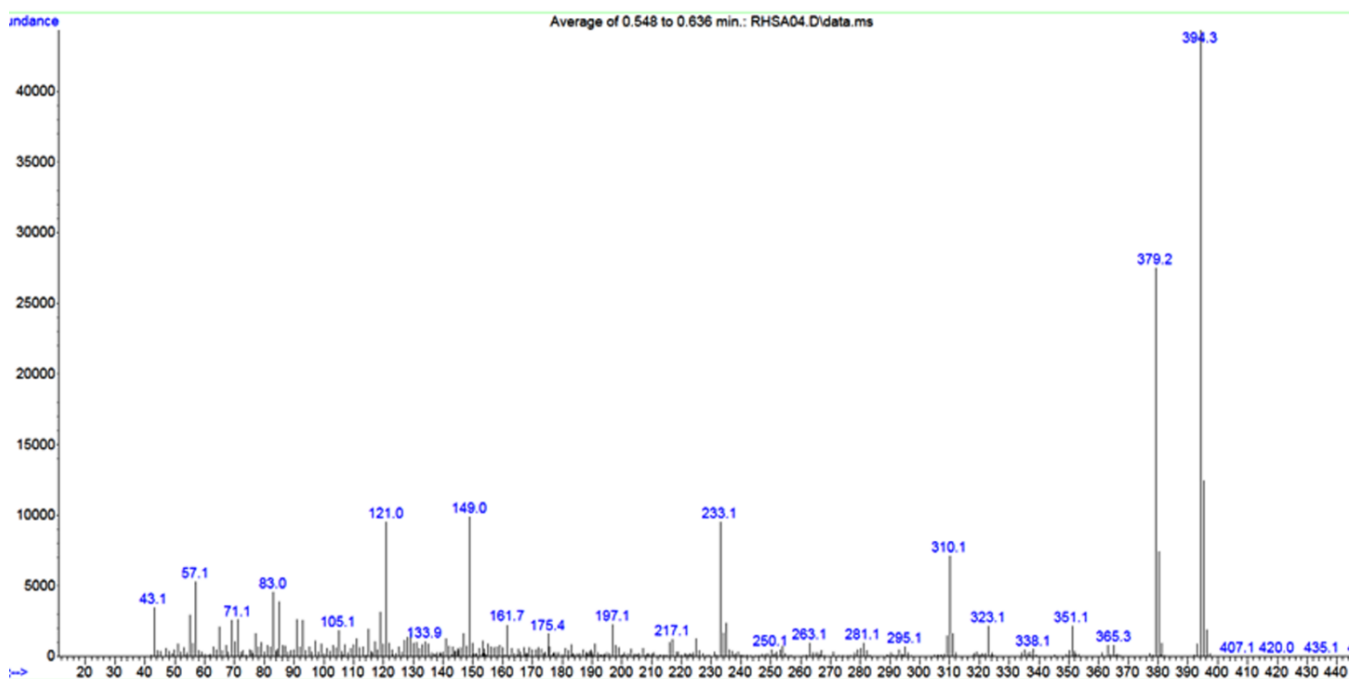

Figure S6. EIMS spectrum of 5f.

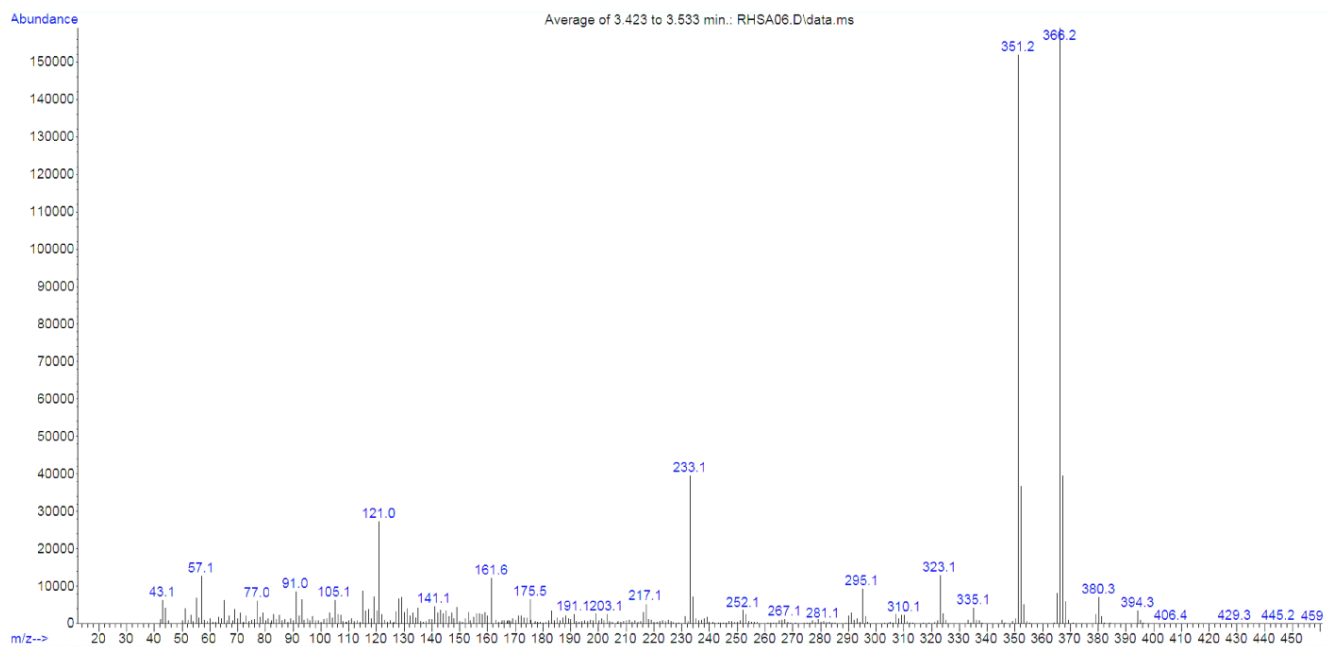

Figure S7. EIMS spectrum of 5h.

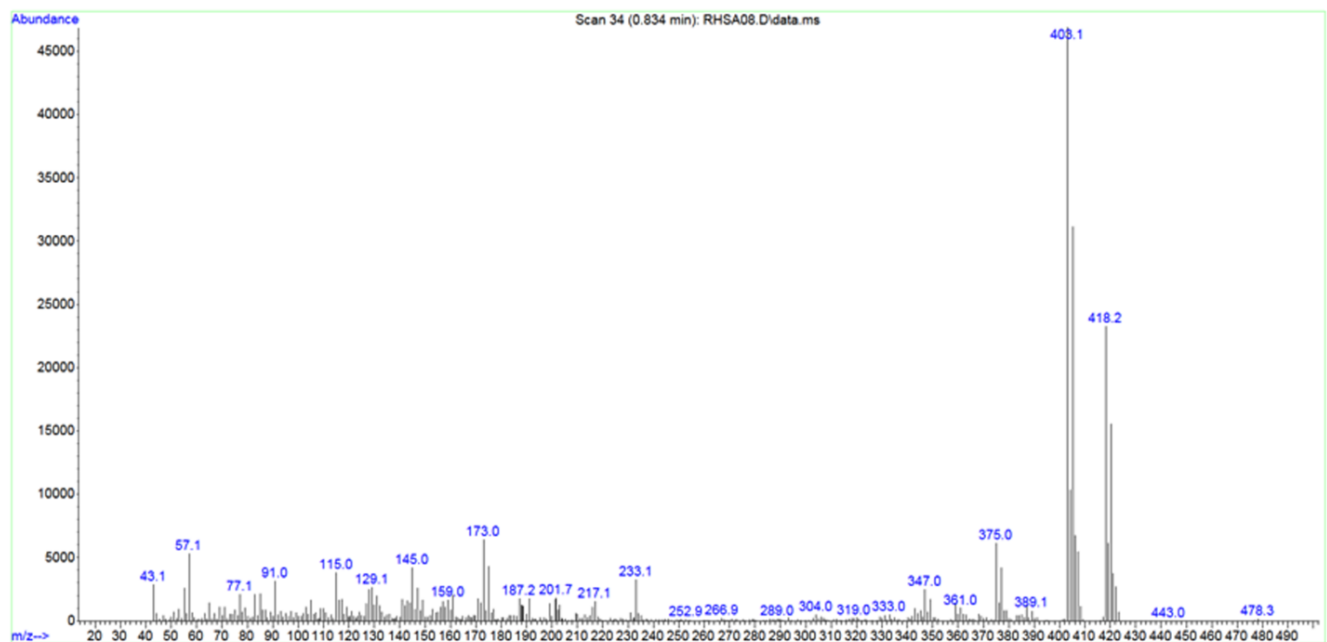

Figure S8. EIMS spectrum of **5i**.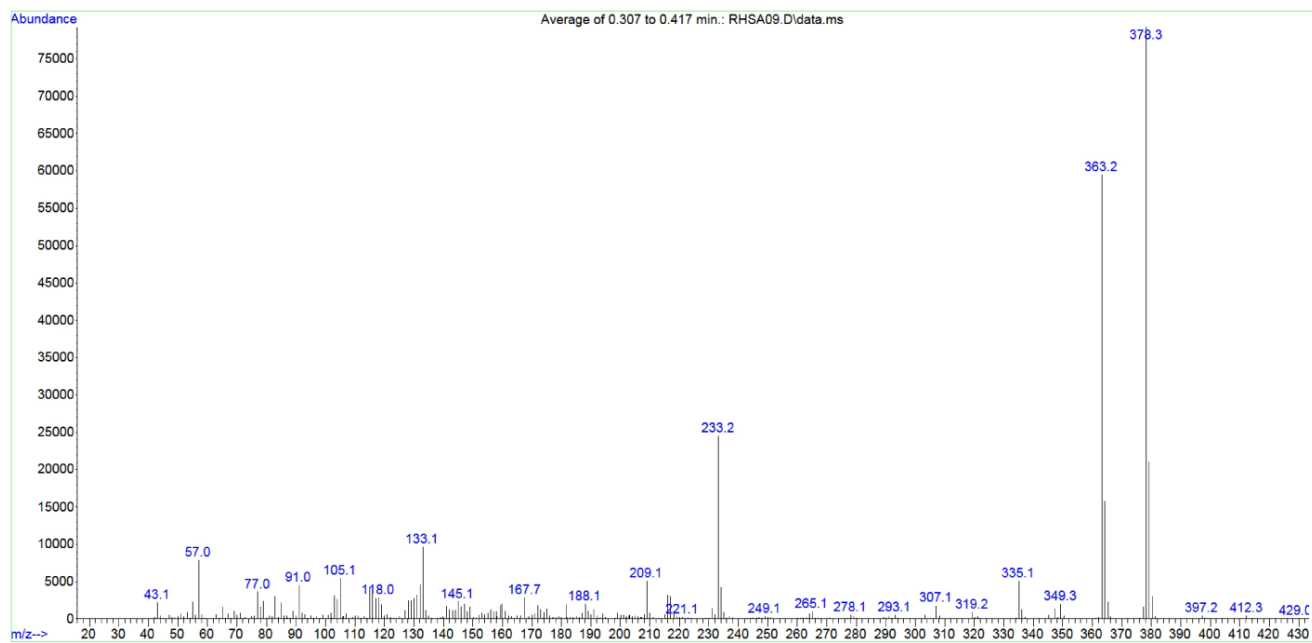

Supplement: molecules-19-03436-s001.pdf [file molecules-19-03436-s001.pdf]
